# Supplementary material
Source: PubMed Central journal article supplement (PMC4335267)
Supplement: NIHMS600711-supplement-01.pdf [file NIHMS600711-supplement-01.pdf]

## SUPPLEMENTAL INFORMATION

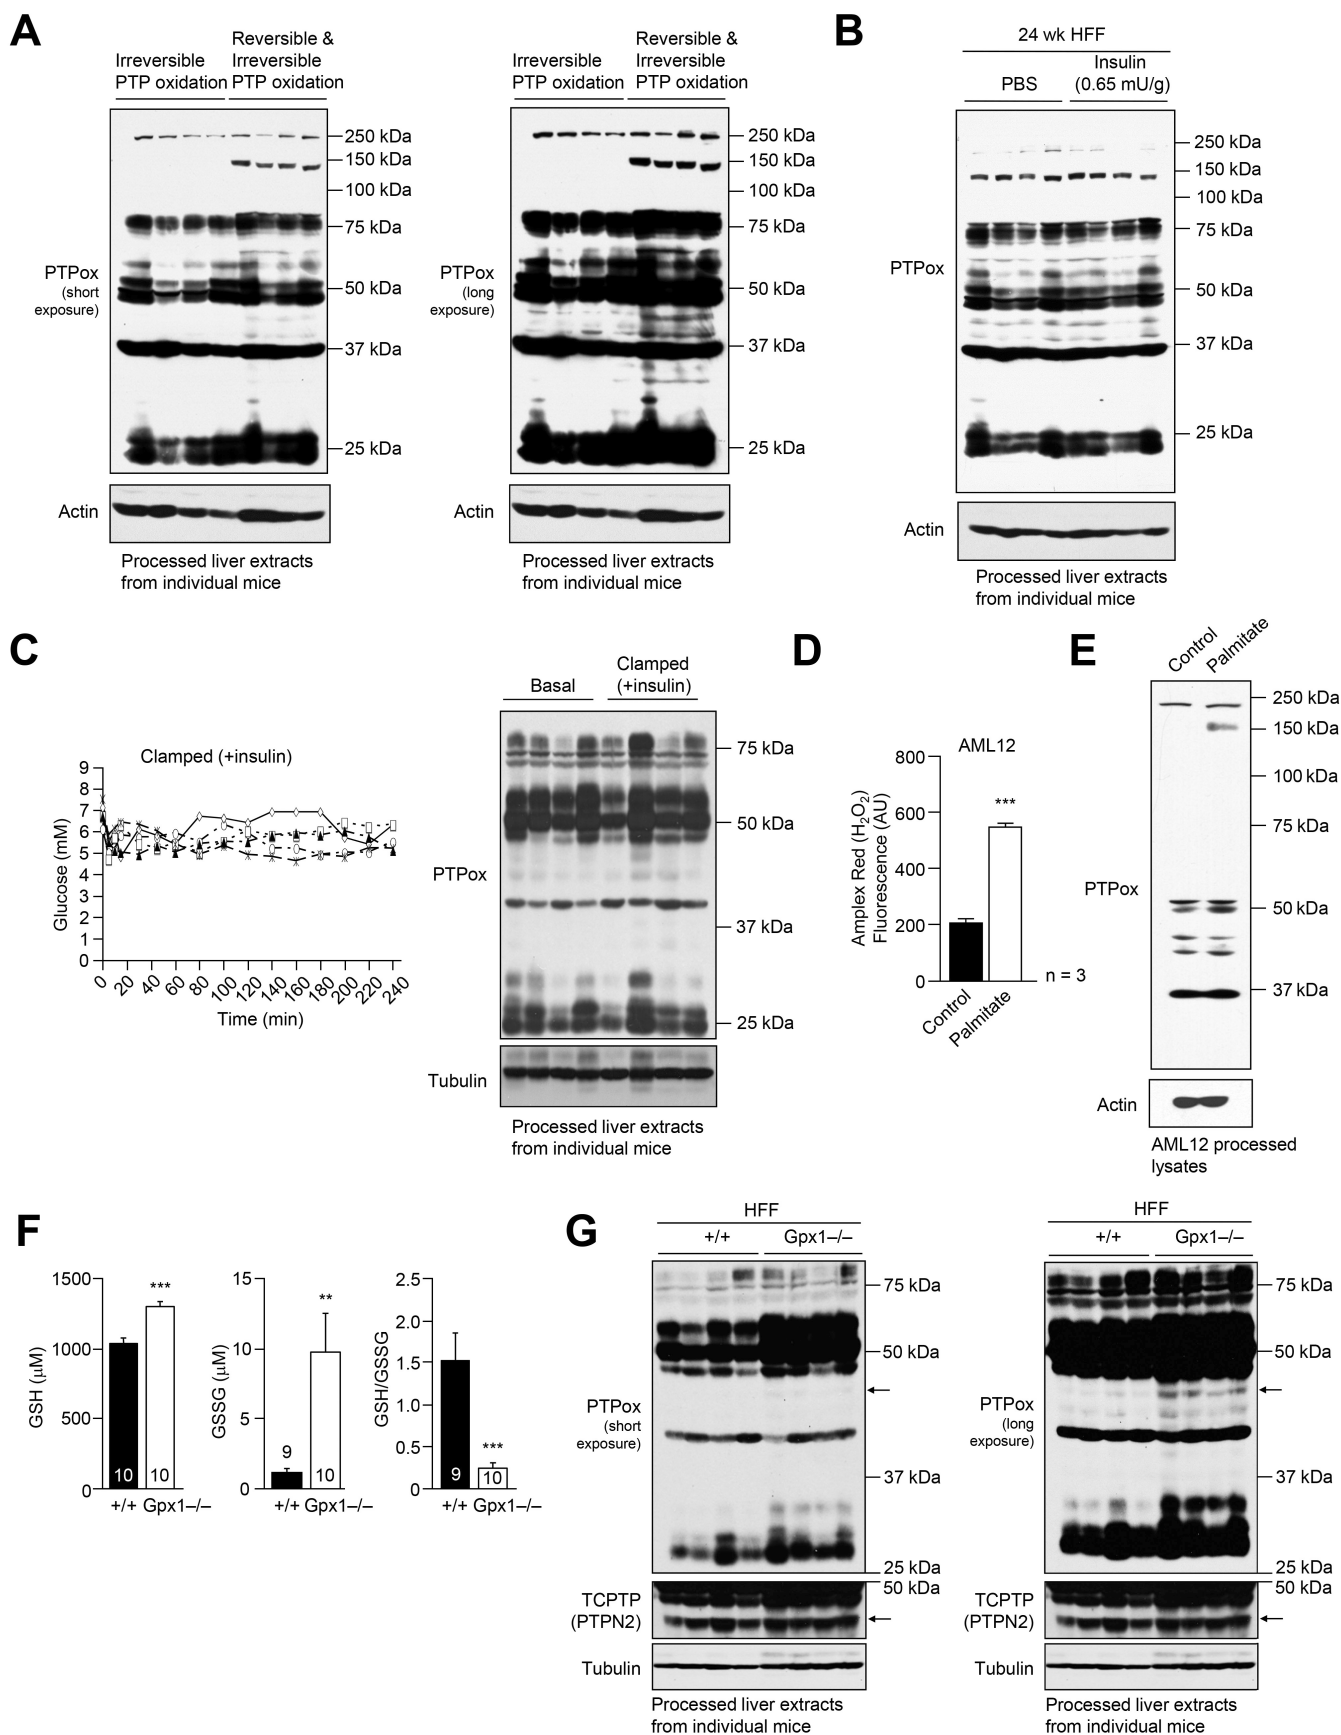

(Refer to figure legend on next page)

**Supplementary Figure 1, related to Figures 1 and 2. Hepatic PTP oxidation.** (a) Eight week-old male C57BL/6 mice were HFF for 24 weeks and livers isolated and homogenised in the presence of NEM. The clarified extracts were resolved by SDS-PAGE and immunoblotted with the PTPox antibody to monitor for irreversible PTP oxidation (-SO<sub>3</sub>H), or otherwise processed for the detection of total (reversible and irreversible PTP oxidation; as described in Material and Methods) and then subjected to SDS-PAGE and immunoblotting with the PTPox antibody. (b) Eight week-old male C57BL/6 mice were HFF for 24 weeks, fasted and then injected with PBS or insulin (0.65 mU insulin/g body weight, 10 min) and livers extracted and processed for an assessment of total PTP oxidation by immunoblotting with the PTPox antibody. (c) Twenty week-old male C57BL/6 mice were fasted overnight and subjected to hyperinsulinemic euglycemic clamps (60 mU/ml insulin infused at 20-40  $\mu$ l/min and fasted blood glucose levels maintained by the co-infusion of 5% w/v glucose). Blood glucose levels in individual clamped mice are shown. Livers were extracted and processed for an assessment of total PTP oxidation by immunoblotting with the PTPox antibody. (d-e) AML hepatocytes were either left untreated or treated with 0.5 mM palmitate-BSA overnight and (d) H<sub>2</sub>O<sub>2</sub> production measured in live cells using Amplex Red and normalised to total protein, or (e) processed for an analysis of total PTP oxidation and immunoblotted with PTPox. (f-g) Ten week-old male Gpx1<sup>+/+</sup> and Gpx1<sup>-/-</sup> mice were HFF for 24 weeks and (f) whole blood GSH, GSSG and GSH/GSSG ratios determined and (g) livers extracted and processed for an assessment of total PTP oxidation by immunoblot analysis with the PTPox antibody. Results shown in (d, f) are means  $\pm$  SEM for the indicated number of mice and are representative of at least two independent experiments. Significance was determined using 2-tailed student's t-test; \*\*p<0.01, \*\*\*p<0.001.

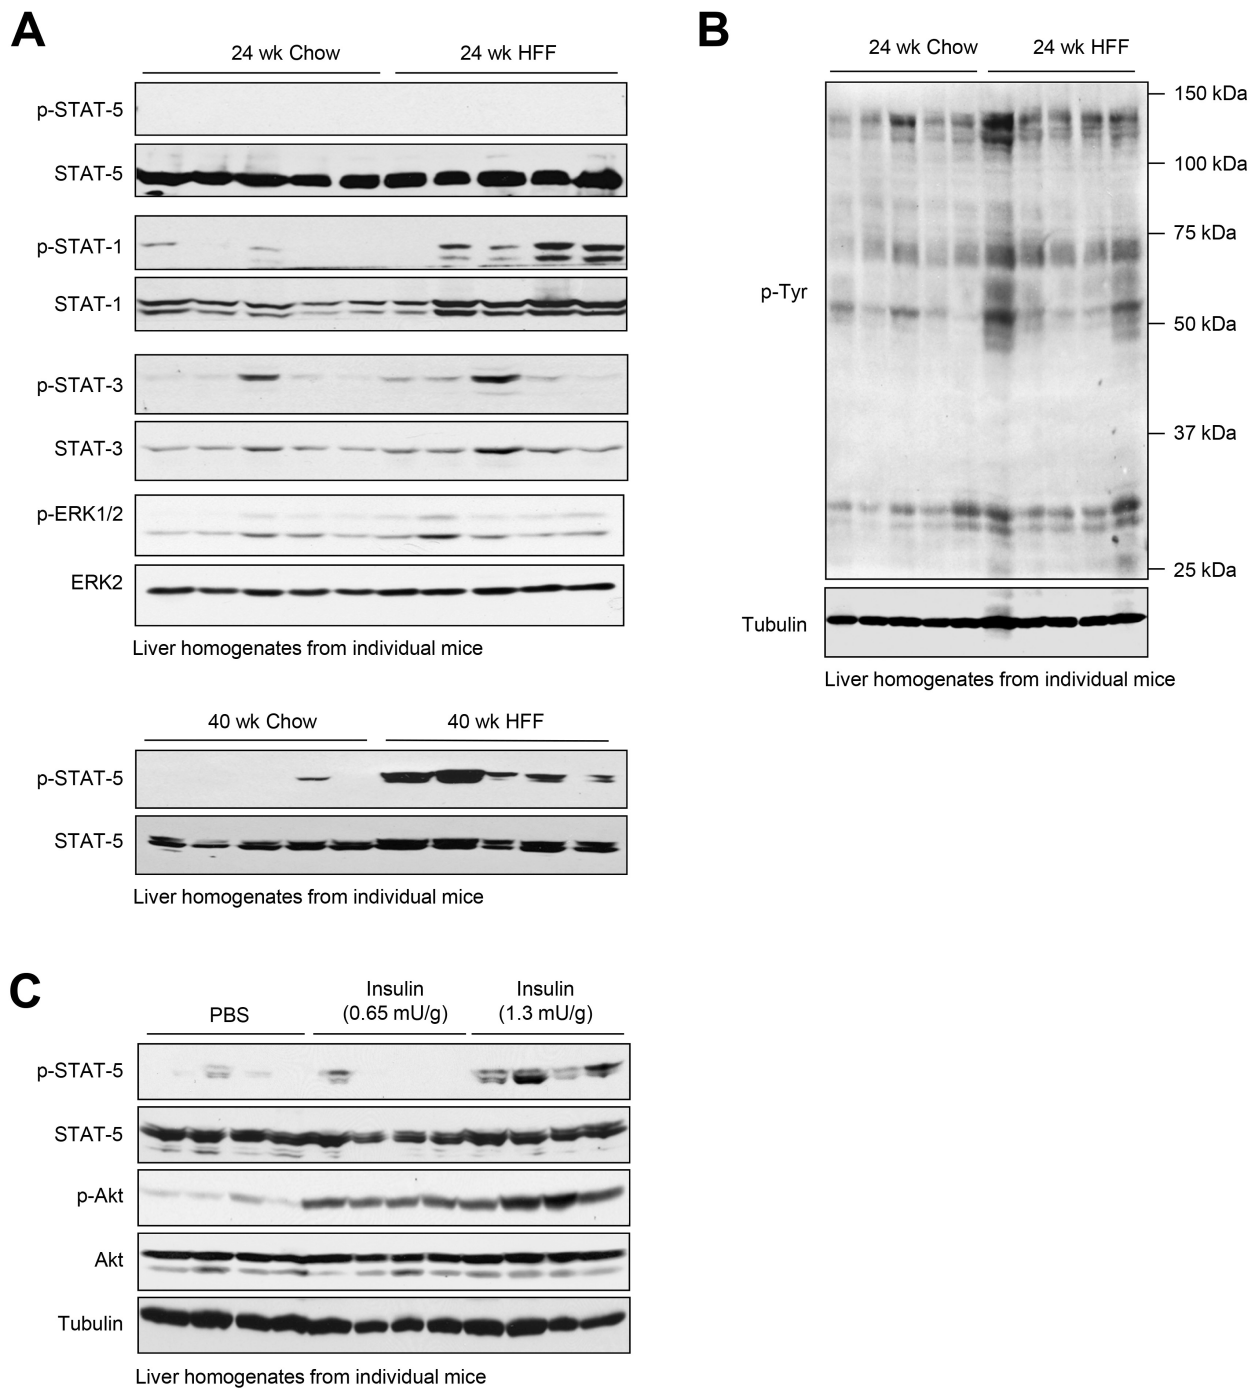

**Supplementary Figure 2, related to Figure 2. Hepatic STAT-1, STAT-3 and STAT-5 signaling.**

**(a-b)** Eight week-old male C57BL/6 mice were chow fed or high fat-fed (HFF) for 24 or 40 weeks as indicated and livers extracted from fasted (4h) mice and processed for immunoblotting. **(c)** Eight week-old male C57BL/6 chow fed mice were fasted for 6 h and injected with PBS or insulin (0.65-1.3 mU/g, 10 min) and livers extracted and processed for immunoblot analysis with the indicated antibodies.

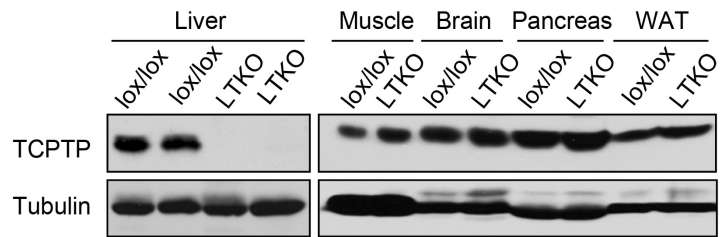

**Supplementary Figure 3, related to Figure 3. Generation of LTKO mice.** Tissue homogenates from *Ptpn2*<sup>lox/lox</sup> (lox/lox) and *Alb-Cre;Ptpn2*<sup>lox/lox</sup> (LTKO) mice were processed for immunoblotting to monitor for TCPTP deletion. Representative results are shown.



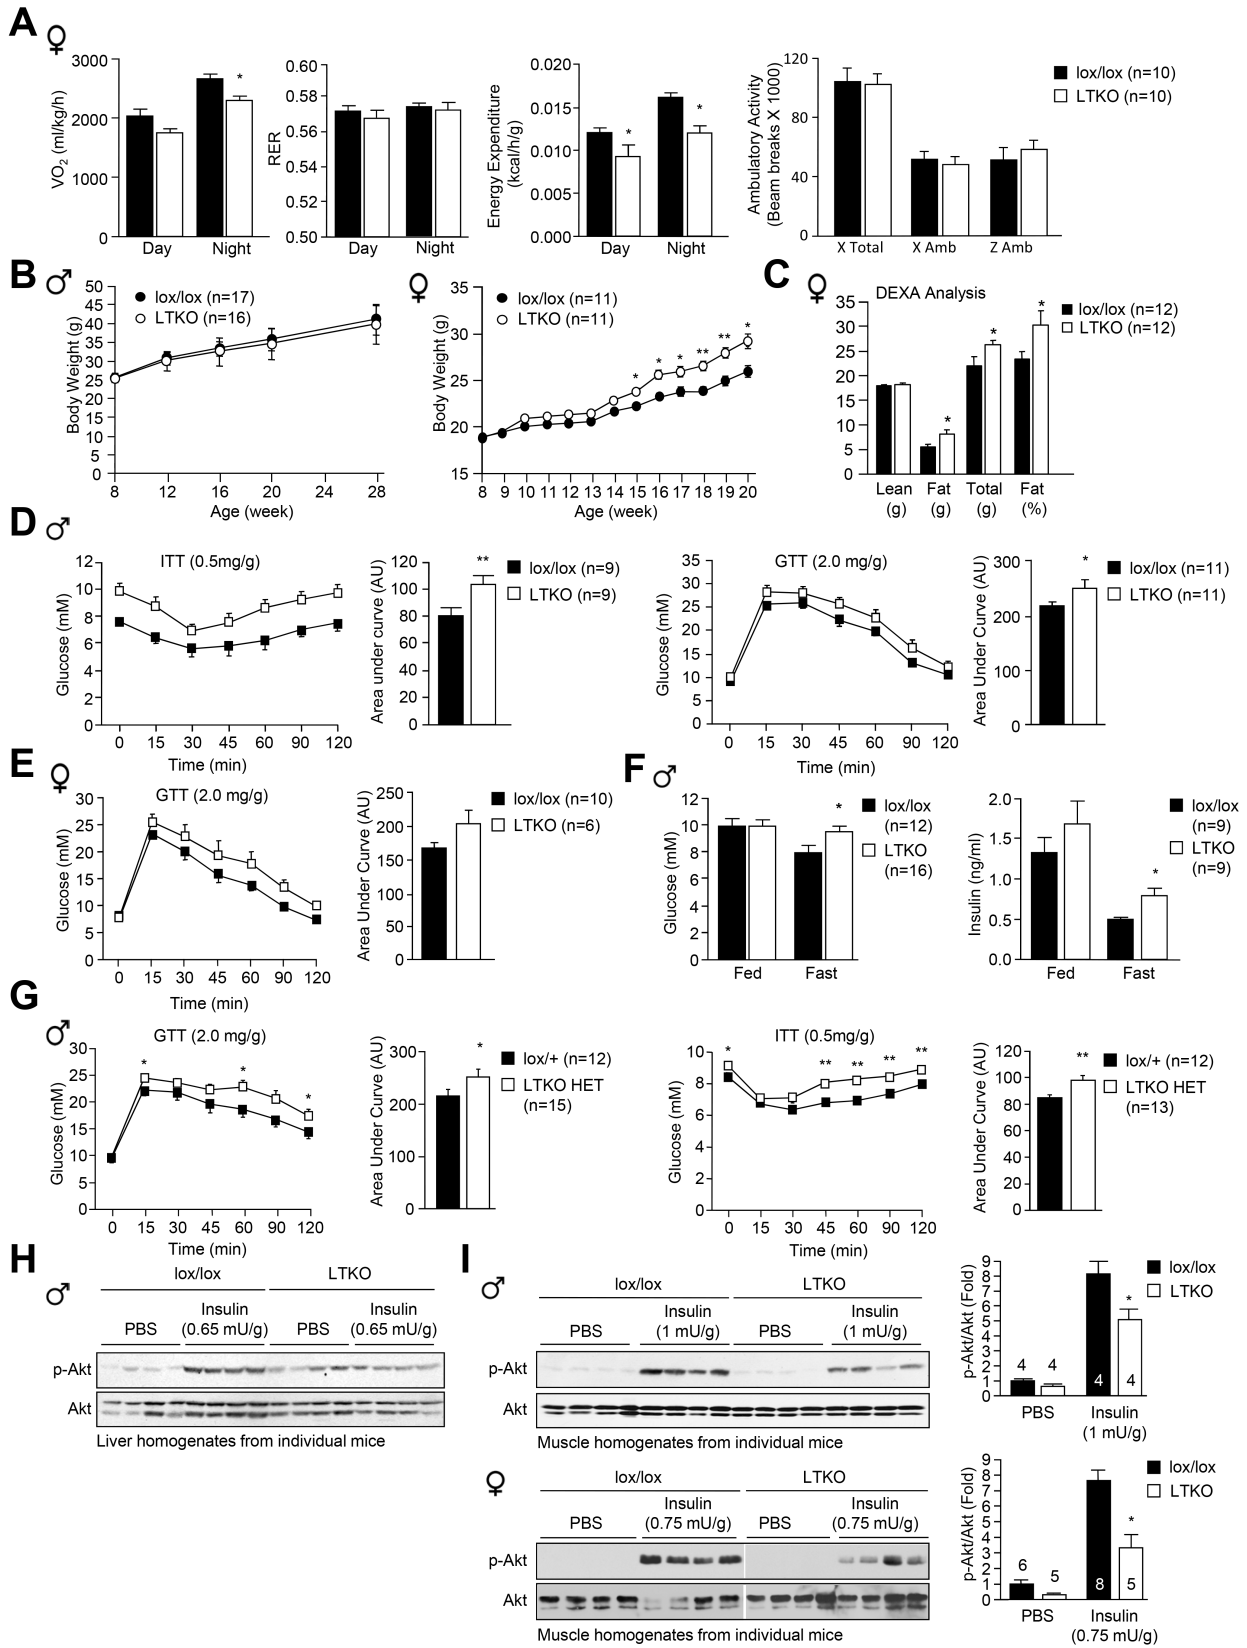

(Refer to figure legend on next page)

**Supplementary Figure 4, related to Figure 3. HFF LTKO and LTKO HET mice exhibit decreased energy expenditure, insulin resistance and glucose intolerance.** (a) Seven week-old female lox/lox control and LTKO mice were HFF for 12 weeks and day and night oxygen consumption, respiratory exchange ratios (RER=  $VO_2/VCO_2$ ), energy expenditure and ambulatory activity were assessed using a Comprehensive Lab Animal Monitoring System (CLAMS) fitted with open circuit indirect calorimetry and activity monitors. (b) Eight week-old male versus female lox/lox control and LTKO mice were fed a standard chow diet and weekly body weight monitored. (c) Body composition (as assessed by DEXA) in 20 week-old female mice fed a chow diet. (d, e, g) Seven week-old male versus female lox/lox and LTKO mice, or *Ptpn2*<sup>lox/+</sup> (lox/+) and *Alb-Cre;Ptpn2*<sup>lox/+</sup> (LTKO HET) were HFF for 12 weeks and 20 weeks respectively. HFF mice were subjected to insulin tolerance tests (0.5 mU/g) or glucose tolerance tests (2 mg/g); areas under curves were determined and arbitrary units (AU) are shown. (f) Seven week-old male lox/lox and LTKO mice were HFF for 12 weeks and fed and fasted blood glucose and plasma insulin levels determined. (h-i) Seven week-old male versus female lox/lox and LTKO mice were HFF for 12 weeks, fasted for 6 h and then injected with PBS or insulin (0.65-1.0 mU/g, 10 min). *Gastrocnemius* muscle or livers were extracted and processed for immunoblotting; representative and quantified results are shown. Results shown are means  $\pm$  SEM; significance was determined using 2-tailed student's t-test; \*p<0.05, \*\*p<0.01.

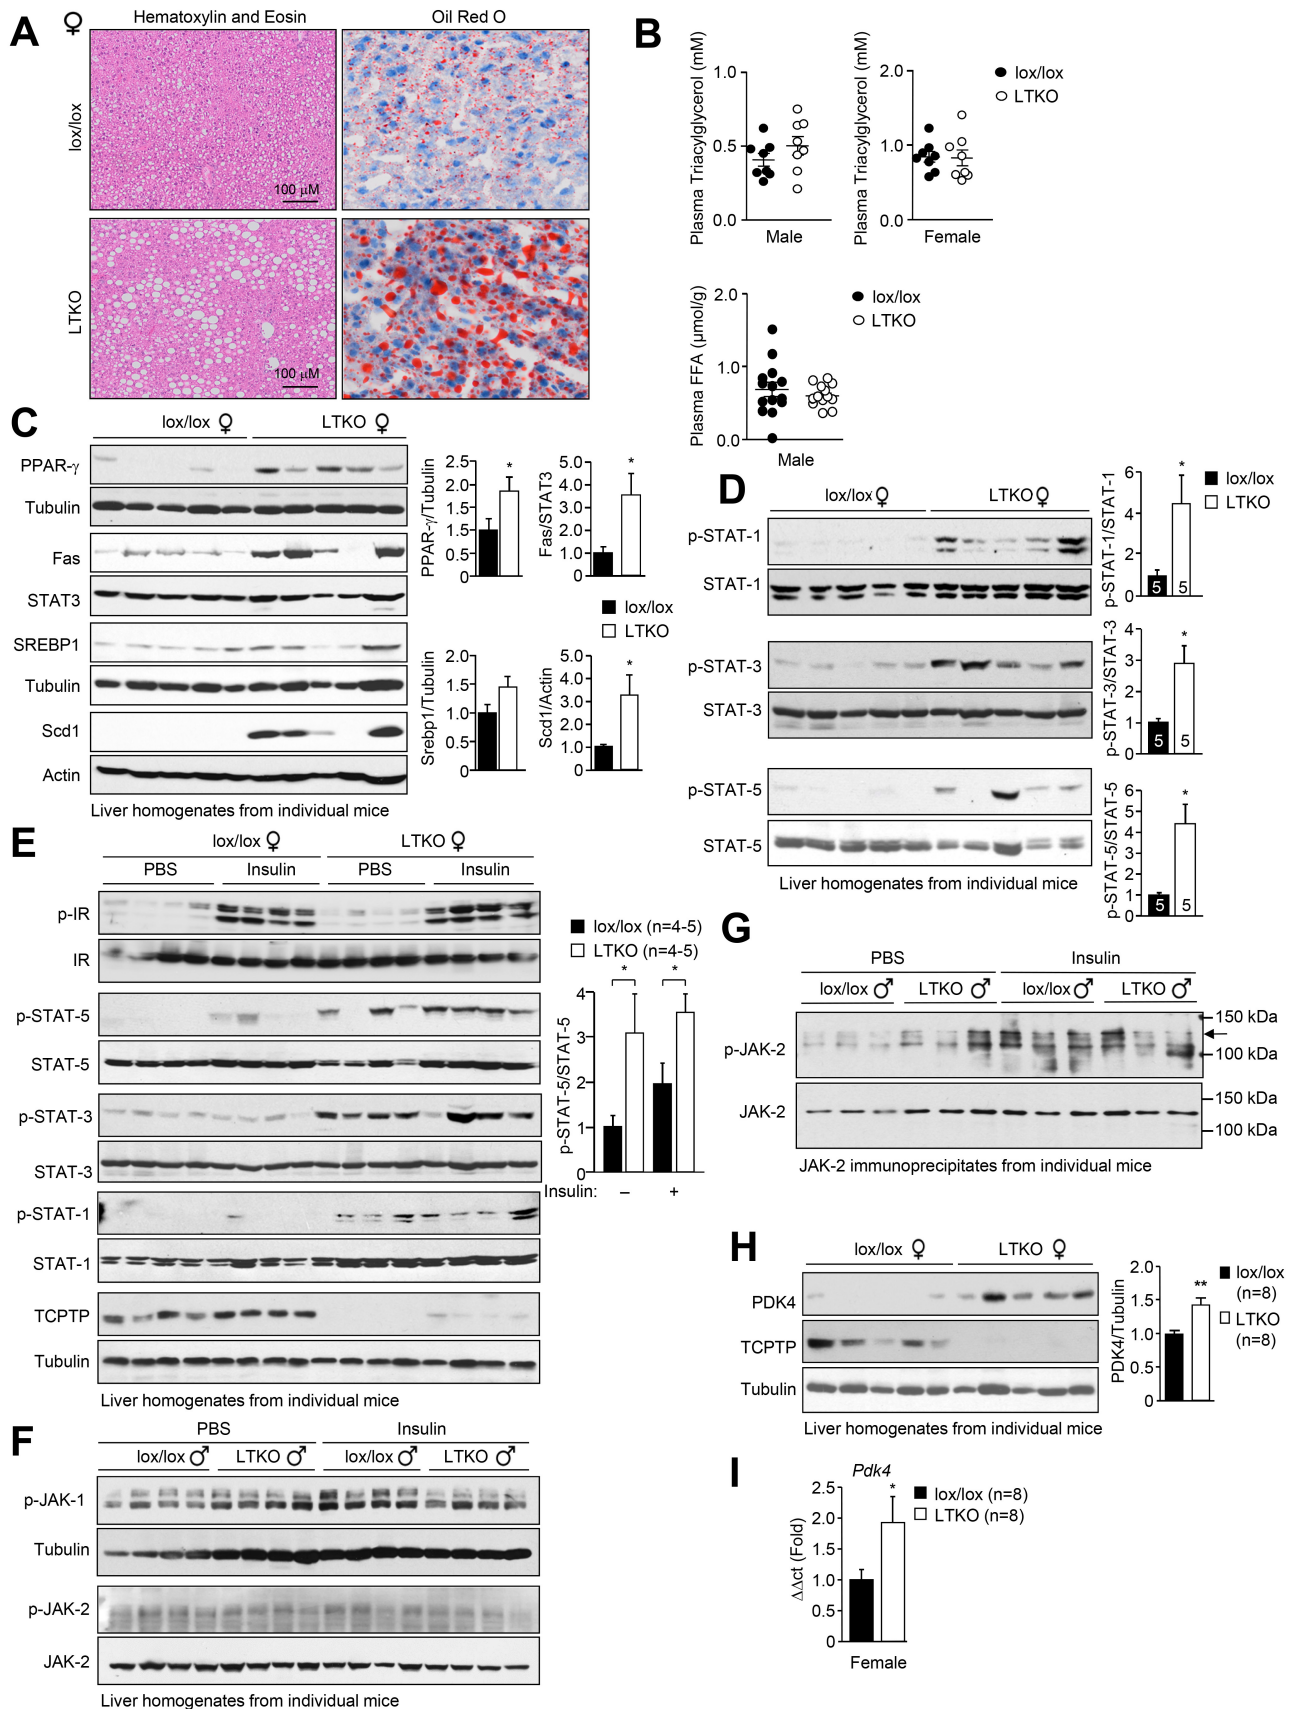

(Refer to figure legend on next page)

***Supplementary Figure 5, related to Figures 4 and 5. HFF LTKO mice exhibit increased hepatic STAT-1, STAT-3 and STAT-5 signaling, PPAR $\gamma$ , Fas, Scd1 and PDK4 expression and steatosis.***

Seven week-old female lox/lox and LTKO mice were HFF for 12 weeks. **(a)** Livers were extracted and fixed in formalin or frozen in OCT and processed for histological assessment (stained with hematoxylin and eosin staining and Oil Red O respectively). **(b)** Fed plasma triacylglycerol and free fatty acid (FFA) levels were determined. **(c-d)** Livers were extracted from fasted (4 h) mice and processed for immunoblot analysis. **(e)** Mice were fasted for 4 h and injected with PBS or insulin (0.75 mU/g, 10 min) and livers extracted and processed for immunoblot analysis. **(f-g)** Seven week-old male lox/lox and LTKO mice were HFF for 12 weeks, fasted and injected with PBS or insulin (1 mU/g, 10 min) and livers extracted and processed for **(f)** immunoblotting or **(g)** JAK-2 immunoprecipitation and immunoblotting. **(h-i)** Seven week-old female lox/lox and LTKO mice were HFF for 12 weeks, fasted for 4 h and livers extracted and processed for **(h)** immunoblot analysis or **(i)** quantitative ( $\Delta\Delta\text{Ct}$ ) real time PCR to monitor for the expression of *Pdk4*. Results shown are means  $\pm$  SEM; significance was determined using 2-tailed student's t-test; \* $p < 0.05$ , \*\* $p < 0.01$ .

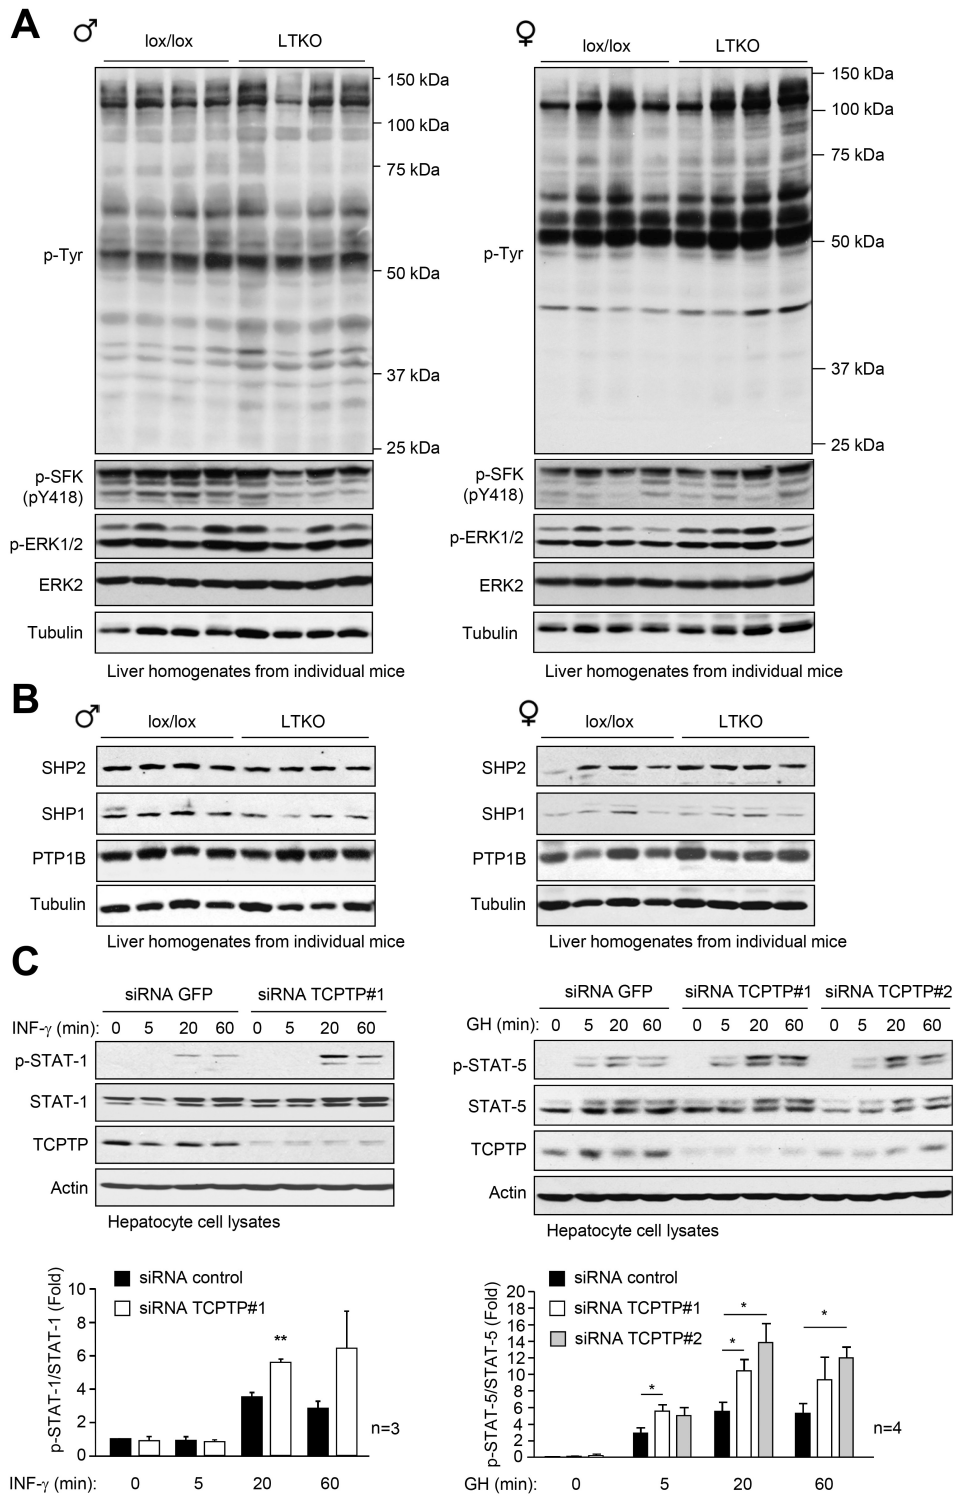

(Refer to figure legend on next page)

***Supplementary Figure 6, related to Figure 5. Tyrosine phosphorylation-dependent signaling is not altered in general in HFF LTKO mice. (a-b)*** Seven week-old male versus female lox/lox and LTKO mice were HFF for 12 weeks, fasted for 4 h and livers extracted and processed for immunoblot analysis. ***(c)*** Primary hepatocytes were isolated from chow fed C57BL/6 mice and transfected with *GFP* control or *Ptpn2*-specific siRNAs and 48 h later serum starved for 6 h and stimulated with 50 U/ml IFN- $\gamma$  or 200 ng/ml GH for the indicated times and processed for immunoblot analysis. Quantified results are means  $\pm$  SEM; significance was determined using 2-tailed student's t-test; \* $p < 0.05$ , \*\* $p < 0.01$ .

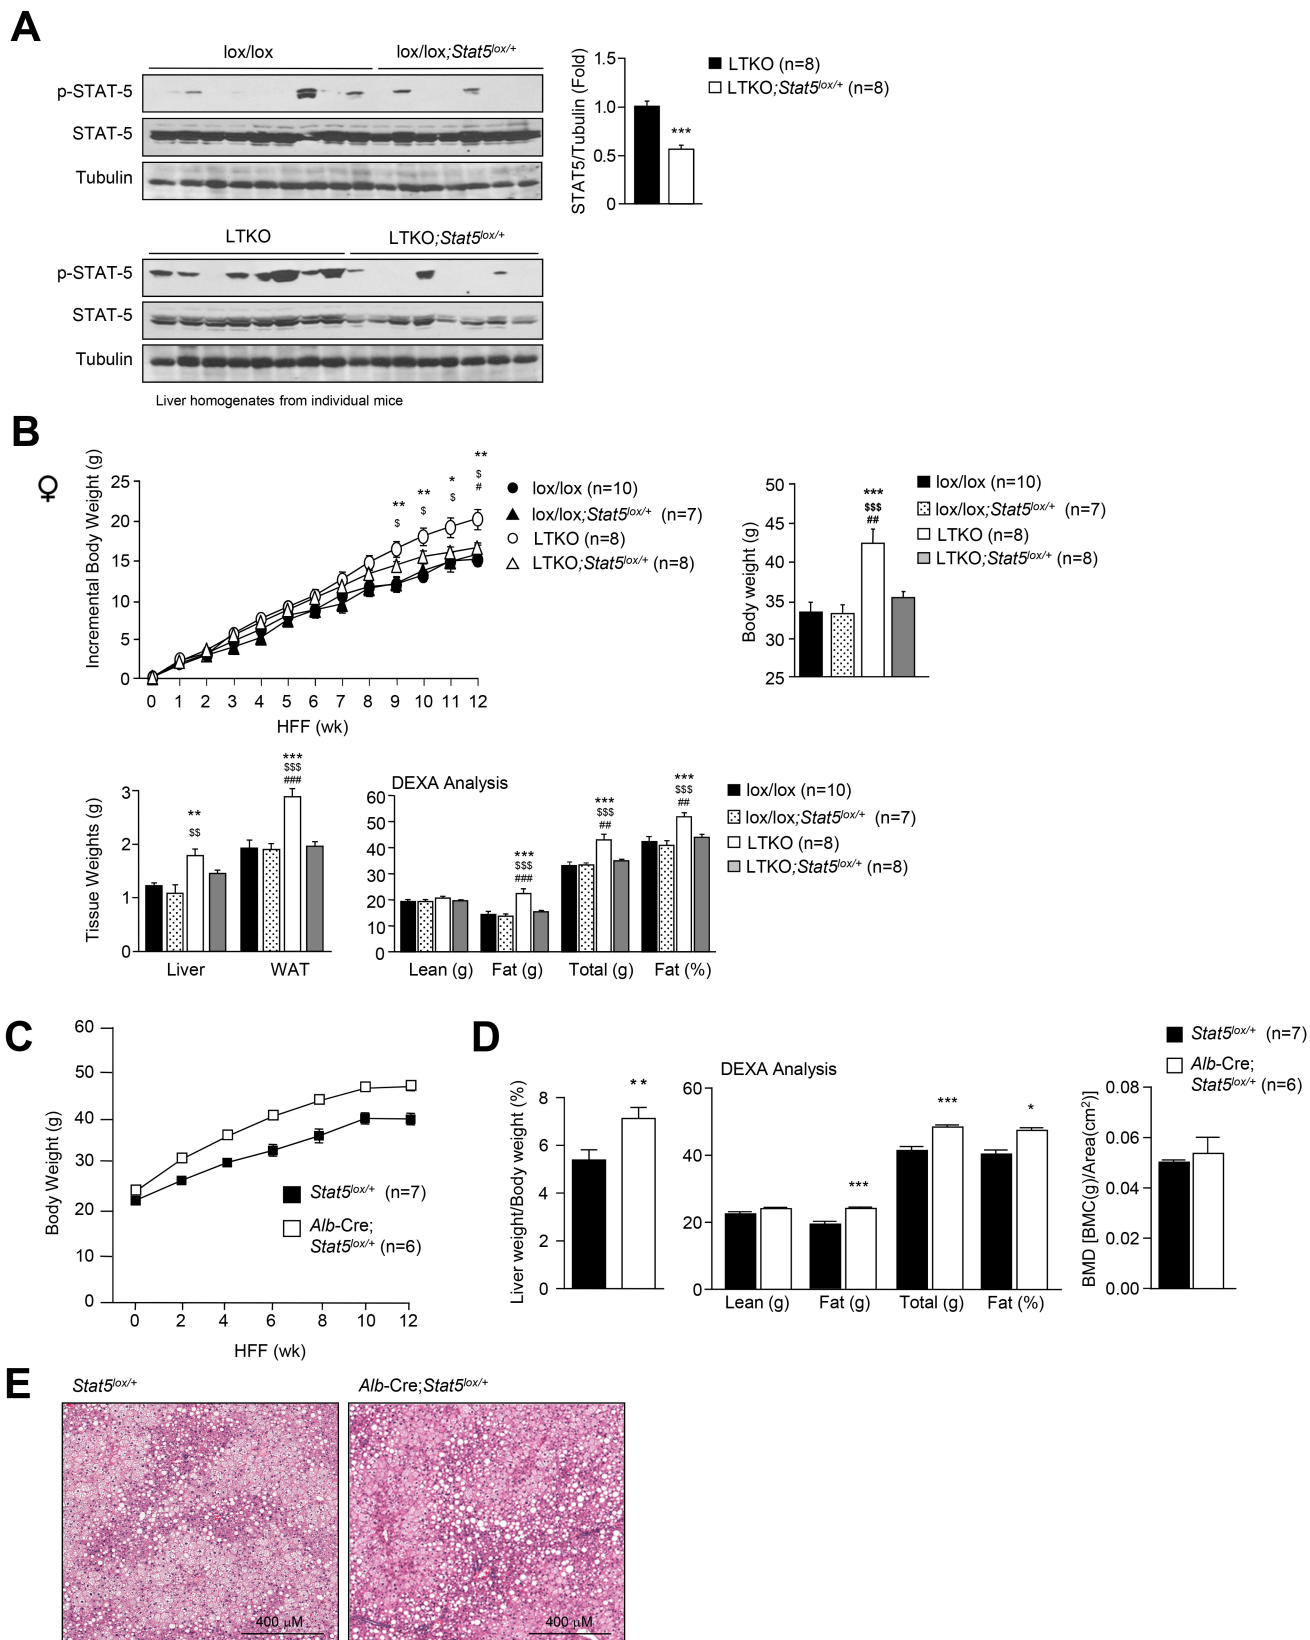

(Refer to figure legend on next page)

**Supplementary Figure 7, related to Figure 6. STAT-5 heterozygosity corrects the obesity phenotype in HFF LTKO mice.** Seven week-old female lox/lox, *Ptpn2*<sup>lox/lox</sup>; *Stat5*<sup>lox/+</sup> (lox/lox; *Stat5*<sup>lox/+</sup>), LTKO mice, and *Alb-Cre*; *Ptpn2*<sup>lox/lox</sup>; *Stat5*<sup>lox/+</sup> (LTKO; *Stat5*<sup>lox/+</sup>) mice were HFF for 12 weeks. (a) Liver homogenates were processed for immunoblotting and STAT-5 levels quantified and normalised to tubulin. Quantified results are means ± SEM and significance was determined using 2-tailed student's t-test; \*\*\*p<0.001. (b) Body and tissue weights were determined and body composition assessed by DEXA. Results shown are means ± SEM; significance was determined using a one-way ANOVA; \* LTKO versus lox/lox, \$ LTKO versus lox/lox; *Stat5*<sup>lox/+</sup>, # LTKO versus LTKO; *Stat5*<sup>lox/+</sup>; \*,\$.# p<0.05, \*\*,\$.## p<0.01, \*\*\*,\$\$,### p<0.001. (c-d) Seven-week-old male *Stat5*<sup>lox/+</sup> and *Alb-Cre*; *Stat5*<sup>lox/+</sup> mice were HFF for 12 weeks and body and tissue weights monitored/determined and body composition assessed by DEXA. (e) Livers were extracted and processed for histology (hematoxylin and eosin). Quantified results shown are means ± SEM; significance was determined using 2-tailed student's t-test; \*p<0.05, \*\*p<0.01, \*\*\*p<0.001.
